# Supplementary material
Source: Springer Nature journal article supplement (https://www.springermedizin.de/resource/supplementary/12889_2010_2817_MOESM3_ESM.pdf/9490028)
Supplement: MOESM3 [file 9490028]

### Pattern Matrix

|                                                         | Component |      |       |      |      |      |      |
|---------------------------------------------------------|-----------|------|-------|------|------|------|------|
|                                                         | 1         | 2    | 3     | 4    | 5    | 6    | 7    |
| Duration of continuous walking                          | ,882      |      |       |      |      |      |      |
| Total duration of walking                               | ,870      |      |       |      |      |      |      |
| Climbing of stairs                                      | ,870      |      |       |      |      |      |      |
| Total duration of standing                              | ,797      |      |       |      |      |      |      |
| Duration of continuous standing                         | ,780      |      |       |      |      |      |      |
| Climbing                                                | ,719      |      |       |      |      |      |      |
| Prolonged activities in a kneeling or squatting posture | ,685      |      |       |      |      |      |      |
| Kneeling or squatting                                   | ,593      |      | -,322 |      |      |      |      |
| Frequent bending                                        | ,370      |      | ,331  |      |      |      |      |
| Handling objects like keys                              |           | ,914 |       |      |      |      |      |
| Handling objects like pens                              |           | ,905 |       |      |      |      |      |
| Handling cylindrical shapes                             |           | ,888 |       |      |      |      |      |
| Handling objects like tweezers                          |           | ,883 |       |      |      |      |      |
| Handling objects like balls                             |           | ,876 |       |      |      |      |      |
| Frequent stretching of the arm                          |           |      | ,645  |      |      |      |      |
| Lifting and carrying                                    | ,410      |      | ,582  |      |      |      |      |
| Frequent handling of light objects                      |           |      | ,569  |      |      |      |      |
| Frequent handling of heavy loads                        | ,341      |      | ,530  |      |      |      |      |
| Prolonged activities above the shoulder height          |           |      | ,518  |      |      |      |      |
| Pushing and pulling                                     | ,405      |      | ,506  |      |      |      |      |
| Total duration of sitting                               |           |      |       | ,747 |      |      |      |
| Duration of continuous sitting                          |           |      |       | ,744 |      |      |      |
| Changing posture                                        |           |      |       | ,653 |      |      |      |
| Repetitive movements of hands and fingers               |           |      |       |      | ,813 |      |      |
| Precision movements of hands and fingers                |           |      |       |      | ,715 |      |      |
| Squeezing and gripping strength                         |           |      |       |      | ,692 |      |      |
| Total duration of working with keyboard and mouse       |           |      | ,334  |      | ,575 |      |      |
| Twisting movements with hand and arm                    |           |      | ,387  |      | ,522 |      |      |
| Touch                                                   |           |      |       |      | ,465 |      |      |
| Operate a keyboard and handle a mouse                   |           |      |       |      | ,459 |      |      |
| Head movements                                          |           |      |       |      |      | ,887 |      |
| Keeping one's head in a fixed position for some time    |           |      |       |      |      | ,883 |      |
| Turning                                                 |           |      |       |      |      |      | ,644 |
| Bending                                                 |           |      |       |      |      |      | ,576 |
| Stretching of the arm                                   |           |      |       |      |      |      | ,513 |
| Prolonged activities in a bended or turned posture      |           |      |       |      |      |      | ,450 |

Extraction Method: Principal Component Analysis.

Rotation Method: Oblimin with Kaiser Normalization.

KMO: 0.930; MSA > 0.769

Cumulative percentage of variance explained (seven factors): 64.6%
